# Supplementary material for: Controlling measles using supplemental immunization activities: A mathematical model to inform optimal policy
Source: PubMed Central journal article supplement — Vaccine. 2015 Mar 3;33(10):1291–6. doi: 10.1016/j.vaccine.2014.11.050 (PMC4336184; doi:10.1016/j.vaccine.2014.11.050), 2015-03-03
Supplement: mmc1.pdf [file mmc1.pdf]

## Supplementary Data - Model equations and analytical derivations

### 1. Model equations

The model is described by the following set of partial differential equations:

$$\frac{\partial S}{\partial t} + \frac{\partial S}{\partial a} = -\lambda S - \mu(a)S - \kappa(t, a)S$$

$$\frac{\partial I}{\partial t} + \frac{\partial I}{\partial a} = \lambda S - \mu(a)I - \gamma I - \kappa(t, a)I$$

$$\frac{\partial R}{\partial t} + \frac{\partial R}{\partial a} = \gamma I - \mu(a)R - \kappa(t, a)R$$

$$\frac{\partial VS}{\partial t} + \frac{\partial VS}{\partial a} = -\lambda VS - \mu(a)VS + (1 - \tau)\kappa(t, a)S - \tau\kappa_2(t, a)VS$$

$$\frac{\partial VI}{\partial t} + \frac{\partial VI}{\partial a} = \lambda VS - \mu(a)VI + \kappa(t, a)I - \gamma VI$$

$$\frac{\partial VR}{\partial t} + \frac{\partial VR}{\partial a} = \gamma VI - \mu(a)VR + \tau\kappa(t, a)S + \tau\kappa_2(t, a)VS$$

supplemented by the following conditions:

$$S(t, a) + I(t, a) + R(t, a) + VS(t, a) + VI(t, a) + VR(t, a) = N(t, a)$$

$$S(t, 0) = \nu N(t, 0)$$

$t$  is the time (in years),  $a$  is the age (in years).  $S, I, R, VS, VI, VR$  are the numbers of susceptible, infected, recovered, vaccinated susceptible, vaccinated infected, and vaccinated recovered, within the total population  $N$ .  $\kappa(t, a)$  is the coverage of measles immunization for individuals vaccinated for the first time in year  $t$  at age  $a$ : it can be through routine immunization (MCV1) (in which case  $a < 1$ ) or through supplemental immunization activity (SIA) (in which case  $a < 1$ ).  $\kappa_2(t, a)$  is the coverage of measles immunization for individuals vaccinated for the second time in year  $t$  at age  $a$ : it is through SIA only (in which case  $a < 1$ ).  $\tau$  is the effectiveness of measles vaccine:  $\tau = 0.85$  for individuals vaccinated once through MCV1,  $\tau = 0.95$  for individuals vaccinated once through SIA, and  $\tau = 0.98$  for individuals vaccinated twice. Finally,  $\lambda$

represents the force of infection and is a function of  $I$  and  $VI$ ;  $\nu$  is the birth rate in the population,  $\mu(a)$  is the mortality rate at age  $a$ , and  $\gamma$  is the infectiousness period of measles.

## 2. Analytical derivation

Assume routine coverage  $\kappa_R$  at effectiveness  $\tau_R$  and SIA coverage  $\kappa_S$  at effectiveness  $\tau_S$ . We use a standard SIR model [1]:

$$\frac{dS}{dt} = \nu(1 - \tau_R\kappa_R) - \beta IS - \mu S - \tau_S\kappa_S \sum_{n=0}^{\infty} S(nT_-)\delta(t - nT)$$

$$\frac{dI}{dt} = \beta IS - \mu I - \gamma I$$

$t$  is the time (in years).  $S$  and  $I$  are the numbers of susceptible and infected within the total population.  $\beta$  is the contact rate between two individuals;  $\nu$  is the birth rate in the population,  $\mu$  is the mortality rate, and  $\gamma$  is the infectiousness period of measles.  $\delta$  is the Dirac delta function.

$T$  is the inter-period between two SIAs,  $T_-$  depicts the instant just before which SIAs happen. We assume  $I(t) = 0$  for  $t \geq 0$  (there are no infections). Hence:

$$\frac{dS}{dt} = \nu(1 - \tau_R\kappa_R) - \mu S - \tau_S\kappa_S \sum_{n=0}^{\infty} S(nT_-)\delta(t - nT)$$

so that:

$$\frac{dS}{dt} = \nu(1 - \tau_R\kappa_R) - \beta IS - \mu S - \tau_S\kappa_S S(nT_-)\delta(t - nT)$$

for:  $(n - 1)T \leq t \leq nT$

which has the solution:

$$S(t) = S^+ e^{-\mu(t-t_0)} + e^{-\mu t} \int_{t_0}^t e^{\mu x} \nu(1 - \tau_R \kappa_R) dx - [S^+ e^{-\mu T} + e^{-\mu nT} \int_{t_0}^{nT} e^{\mu x} \nu(1 - \tau_R \kappa_R) dx] \tau_S \kappa_S \int_{t_0}^t \delta(u - nT) du$$

We define:

$$Q(t) = S^+ e^{-\mu(t-t_0)} + e^{-\mu t} \int_{t_0}^t e^{\mu x} \nu(1 - \tau_R \kappa_R) dx$$

hence:

$$S(t) = \begin{cases} Q(t), t_0 = (n-1)T \leq t < nT \\ (1 - \tau_S \kappa_S) Q(t), t = nT \end{cases}$$

We then look for fixed points:

$$\Pi(S_n) = S_n$$

$$S^+ e^{-\mu T} + e^{-\mu T} \int_{(n-1)T}^{nT} e^{\mu x} \nu(1 - \tau_R \kappa_R) dx = S^+$$

hence:

$$S^+ = \frac{(1 - \tau_S \kappa_S) e^{-\mu T}}{1 - (1 - \tau_S \kappa_S) e^{-\mu T}} \int_0^T e^{\mu x} \nu(1 - \tau_R \kappa_R) dx$$

Then, the stability of the fixed point is given by:

$$\left| \frac{\partial \Pi}{\partial S}(S = S^+) \right| = |(1 - \tau_S \kappa_S) e^{-\mu T}| < 1$$

Hence, there is convergence to  $S^*$ . Setting  $S = S^*$ , we obtain the periodic solution:

$$\tilde{S}(t) = S^* e^{-\mu t} + e^{-\mu t} \int_0^t e^{\mu x} \nu(1 - \tau_R \kappa_R) dx - [S^* e^{-\mu T} + e^{-\mu T} \int_0^T e^{\mu x} \nu(1 - \tau_R \kappa_R) dx] \tau_S \kappa_S \int_0^t \delta(u - T) du$$

For stability, we need to have:

$$\int_0^T S(\tilde{t})dt < \frac{\mu + \gamma}{\beta} T$$

which leads to the following condition:

$$\frac{(1 - \tau_S \kappa_S) e^{-\mu T}}{1 - (1 - \tau_S \kappa_S) e^{-\mu T}} \int_0^T e^{\mu x} v(1 - \tau_R \kappa_R) dx \frac{1 - e^{-\mu T}}{\mu} + \iint_{0_0}^{T t} e^{-\mu(1-x)} v(1 - \tau_R \kappa_R) dx dt < \frac{\mu + \gamma}{\beta} T$$

If we assume  $\kappa_R$  to be constant and we have  $\mu T \ll 1$ , we can do a Taylor expansion:

$$v(1 - \tau_R \kappa_R) T \left[ \frac{1}{2} + \frac{1 - \tau_S \kappa_S}{\tau_S \kappa_S} \right] < \frac{\mu + \gamma}{\beta}$$

The maximum inter-period for SIAs is then:

$$T_{max} = \frac{\mu + \gamma}{\beta} \frac{1}{v} \frac{1}{1 - \tau_R \kappa_R} \frac{\tau_S \kappa_S}{1 - \tau_S \kappa_S / 2}$$

As  $\mu \ll \gamma$ , we obtain:

$$T_{max} \sim \frac{\gamma}{\beta} \frac{1}{v} \frac{1}{1 - \tau_R \kappa_R} \frac{\tau_S \kappa_S}{1 - \tau_S \kappa_S / 2}$$

We now try to estimate what would be the effective coverage of vaccinating SIA coverage of under-five children in the simulation model ( $SIA_{0-4}$ ) and find the equivalent coverage in the analytical model. The effective coverage corresponding to  $SIA_{0-4}$  in the analytical model is given by:

$$\kappa_{S,eff} = SIA_{0-4} d_{0-4}$$

where  $d_{0-4}$  is the fraction of measles cases among the under-fives (as estimated based on routine immunization coverage and as estimated by Global Burden of Disease region by Simons and colleagues [2]).  $\kappa_{S,eff} = 0.70$  for Mali and Nigeria;  $\kappa_{S,eff} = 0.56$  for Ethiopia, Madagascar, and Niger;  $\kappa_{S,eff} = 0.52$  for Burkina Faso;  $\kappa_{S,eff} = 0.47$  for

Afghanistan and India;  $\kappa_{S,eff} = 0.45$  for Indonesia;  $\kappa_{S,eff} = 0.63$  for the Indian states of Bihar and Utter Pradesh.

In addition, population grows and in that sense the birth rate needs to be adjusted every 5 years:

$$\tilde{v} = v \frac{p_{0-4}}{p_{5-9}}$$

where  $p_{0-4}$  and  $p_{5-9}$  are the populations of under-fives and five-nine year-olds, respectively.

Therefore, the maximum inter-period for SIAs is given by:

$$T_{max} \sim \frac{\gamma}{\beta} \frac{1}{\tilde{v}} \frac{1}{1 - \tau_R \kappa_R} \frac{\tau_S \kappa_{S,eff}}{1 - \tau_S \kappa_{S,eff}/2}$$

As  $\frac{1}{R_0} = \frac{\gamma}{\beta}$ , we then obtain:

$$T_{max} \sim \frac{1}{R_0} \frac{1}{\tilde{v}} \frac{1}{1 - \tau_R \kappa_R} \frac{\tau_S \kappa_{S,eff}}{1 - \tau_S \kappa_{S,eff}/2}$$

## References

1. Shulgin B, Stone L, Agur Z. Pulse vaccination in the SIR epidemic model. *Bulletin of Mathematical Biology* 1998; 60:1123-1148.
2. Simons E, Ferrari M, Fricks J, et al. Assessment of the 2010 global measles mortality reduction goal: results from a model of surveillance data. *Lancet* 2012; 379:2173-2178.
